# Supplementary material
Source: PubMed Central journal article supplement (PMC2762274)
Supplement: NIHMS132075-supplement-suppl__tables.pdf [file NIHMS132075-supplement-suppl__tables.pdf]

## Supplemental Data Table 1A

### Gene Regulation in PBMCs from normal donors following 18hr IFN- $\alpha$ treatment *in vitro*

| Gene                                                                     | Function                                                  | Fold Change<br>Post vs Pre-<br>treatment |
|--------------------------------------------------------------------------|-----------------------------------------------------------|------------------------------------------|
| Ubiquitin specific protease 18 ( <i>USP18</i> )                          | Ubiquitin-dependent protein catabolism                    | 15.1                                     |
| CD38 antigen (p45) ( <i>CD38</i> )                                       | Apoptosis                                                 | 8.8                                      |
| Interferon-induced protein 44 ( <i>IFI44</i> )                           | Antiviral response                                        | 7.5                                      |
| DEAD (Asp-Glu-Ala-Asp) box polypeptide 58 ( <i>DDX58</i> )               | Helicase, Deoxyribonuclease, ubiquitin-protein ligase     | 7.1                                      |
| Hect domain and RLD5 ( <i>HERC5</i> )                                    | Regulation of cyclin dependent protein kinase activity    | 7.0                                      |
| 2'-5'-oligoadenylate synthetase 2 ( <i>OAS2</i> )                        | Immune response, nucleic acid metabolism                  | 6.7                                      |
| 2'-5'-oligoadenylate synthetase-like ( <i>OASL</i> )                     | Immune response, nucleic acid metabolism                  | 6.2                                      |
| Lymphocyte antigen 6 complex, locus E ( <i>LY6E</i> )                    | T cell differentiation and activation, antiviral response | 5.8                                      |
| Serine palmitoyltransferase, long chain base subunit 2 ( <i>SPTLC2</i> ) | Unknown                                                   | 4.6                                      |
| Likely ortholog of mouse D11lgp2 ( <i>LGP2</i> )                         | DNA restriction                                           | 4.3                                      |
| Interferon stimulated gene 20kDa ( <i>ISG20</i> )                        | Immune response, proliferation                            | 3.9*                                     |
| Retinoic acid- and interferon-inducible protein ( <i>IFIT2</i> )         | Immune response                                           | 3.8                                      |
| Three prime repair exonuclease 1 ( <i>TREX1</i> )                        | DNA repair and replication                                | 3.6                                      |
| Metallothionein 1H ( <i>MT1H</i> )                                       | Metal ion binding                                         | 3.4                                      |
| Phospholipid scramblase 1 ( <i>PLSCR1</i> )                              | Phospholipid scramblase                                   | 3.2*                                     |
| Metallothionein 1 pseudogene 2 ( <i>M1P2</i> )                           | Metal ion binding                                         | 3.2                                      |
| Metallothionein 2A ( <i>MT2A</i> )                                       | Metal ion binding                                         | 3.0                                      |
| SP110 nuclear body protein ( <i>SP110</i> )                              | Regulation of transcription, transcription factor         | 3.0*                                     |
| Tripartite motif-containing 21 ( <i>TRIM21</i> )                         | Protein ubiquitination                                    | 2.9                                      |
| Zinc finger, CCHC domain containing 2 ( <i>ZCCHC2</i> )                  | Nucleic acid binding                                      | 2.7                                      |
| DR1-associated protein 1 (negative cofactor 2 alpha) ( <i>DRAP1</i> )    | Negative regulation of transcription                      | 2.6                                      |
| Biliverdin reductase A ( <i>BLVRA</i> )                                  | Electron transport                                        | 2.4                                      |
| Interferon regulatory factor 2 ( <i>IRF2</i> )                           | Transcription factor, immune response, proliferation      | 2.3                                      |
| Leukocyte immunoglobulin-like receptor 7 ( <i>LIR7</i> )                 | Immune response, antigen binding                          | 2.3                                      |
| Chondroitin 4-O-sulfotransferase 2 ( <i>CHST12</i> )                     | dermantan sulfate biosynthesis                            | 2.1                                      |
| Interferon, gamma-inducible protein 16 ( <i>IFI16</i> )                  | Transcriptional repressor, monocyte differentiation       | 2.1                                      |
| Nedd4 binding protein 1 ( <i>N4BP1</i> )                                 | Unknown                                                   | 2.1                                      |

Genes had a probe set differentially expressed by more than 2-fold ( $p < 0.001$ ).

\*Significant gene upregulation was observed in multiple probe sets. The displayed changes in expression are the average (geometric mean).

# Supplemental Data Table 1B

## Gene Regulation in T cells from normal donors following 18hr IFN- $\alpha$ treatment *in vitro*

| Gene                                                                         | Function                                                   | Fold Change Post vs Pre-treatment |
|------------------------------------------------------------------------------|------------------------------------------------------------|-----------------------------------|
| Chromosome 1 open reading frame 29 ( <i>C1orf29</i> )                        | Unknown                                                    | 38.3                              |
| Vipirin ( <i>cig5</i> )                                                      | Catalytic activity                                         | 30.7                              |
| Interferon-induced protein with tetratricopeptide repeats 1 ( <i>IFIT1</i> ) | Immune response                                            | 28.7                              |
| 2'-5'-oligoadenylate synthetase 3 ( <i>OAS3</i> )                            | Immune response, nucleic acid metabolism                   | 12.3                              |
| DNA polymerase-transactivated protein 6 ( <i>DNAPTP6</i> )                   | Unknown                                                    | 10.4                              |
| 28kD interferon responsive protein ( <i>IFRG28</i> )                         | Unknown                                                    | 9.6                               |
| Interferon-induced protein 44 ( <i>IFI44</i> ) **                            | Antiviral response                                         | 9.6                               |
| Lectin, galactoside-binding, soluble, 9 (galectin 9) ( <i>LGALS9</i> )       | Positive regulation of NF $\kappa$ B cascade               | 8.0                               |
| Hect domain and RLD5 ( <i>HERC5</i> ) **                                     | Regulation of cyclin dependent protein kinase activity     | 7.5                               |
| A kinase (PRKA) anchor protein 2 ( <i>AKAP2</i> )                            | Enzyme binding                                             | 7.0                               |
| Tumor necrosis factor (ligand) superfamily, member 10 ( <i>TNFSF10</i> )     | Apoptosis, immune response                                 | 5.3                               |
| GPI deacylase ( <i>PGAP1</i> )                                               | Unknown                                                    | 5.1                               |
| Metallothionein 1X ( <i>MT1X</i> )                                           | Metal ion binding                                          | 4.5                               |
| Likely ortholog of mouse D11lgp2 ( <i>LGP2</i> ) **                          | DNA restriction                                            | 4.1                               |
| Lymphocyte-activation gene 3 ( <i>LAG3</i> )                                 | Antigen binding                                            | 4.1                               |
| Tripartite motif-containing 5 ( <i>TRIM5</i> )                               | Transcription factor, zinc ion binding                     | 4.0                               |
| Nuclear antigen Sp100 ( <i>SP100</i> )                                       | Regulation of transcription                                | 3.7                               |
| Metallothionein 1F ( <i>MT1F</i> )                                           | Metal ion binding                                          | 3.3*                              |
| Zinc finger, CCHC domain containing 2 ( <i>ZCCHC2</i> )**                    | Nucleic acid binding                                       | 3.2                               |
| KIAA0082 protein                                                             | Unknown                                                    | 2.9                               |
| Protein kinase D2 ( <i>PRKD2</i> )                                           | Serine/threonine kinase                                    | 2.7                               |
| Spermidine/spermine N1-acetyltransferase ( <i>SAT</i> )                      | Acytransferase activity                                    | 2.6                               |
| Endothelin converting enzyme 1                                               | Unknown                                                    | 2.4                               |
| PDH finger protein 11 ( <i>PHF11</i> )                                       | Regulation of transcription                                | 2.3                               |
| Chromosome 20 open reading frame 18 ( <i>C20orf18</i> )                      | Protein ubiquitination                                     | 2.2                               |
| MHC class I polypeptide-related sequence B ( <i>MICB</i> )                   | Cell recognition                                           | 2.2                               |
| Myeloid differentiation primary response gene (88) ( <i>MYD88</i> )          | Inflammatory response, regulation of NF $\kappa$ B cascade | 2.1                               |
| Small nuclear ribonucleoprotein polypeptide N ( <i>SNRPN</i> )               | RNA processing, splicing                                   | -3.0                              |

Genes had a probe set differentially expressed by more than 2-fold ( $p < 0.001$ ); decreased fold changes are indicated with a negative sign.

\*Significant gene upregulation was observed in multiple probe sets. The displayed changes in expression are the average (geometric mean).

\*\*Gene was also upregulated in normal donor PBMCs at 18 hours

# Supplemental Data Table 1C

## Gene Regulation in NK cells from normal donors following 18hr IFN- $\alpha$ treatment *in vitro*

| Gene                                                                         | Function                                        | Fold Change Post vs Pre-treatment |
|------------------------------------------------------------------------------|-------------------------------------------------|-----------------------------------|
| Interferon, alpha-inducible protein 27 ( <i>IFI27</i> )                      | Immune response                                 | 12.2                              |
| 2',5'-oligoadenylate synthetase 1 ( <i>OAS1</i> )                            | Immune response, nucleic acid metabolism        | 10.2                              |
| Hect domain and RLD 5 ( <i>HERC5</i> ) **                                    | Ubiquitin-protein ligase                        | 8.2                               |
| Myxovirus (influenza virus) resistance 2 ( <i>MX2</i> )                      | Immune response                                 | 7.4                               |
| 2'-5'-oligoadenylate synthetase 3 ( <i>OAS3</i> )                            | Immune response, nucleic acid metabolism        | 7.3                               |
| Likely ortholog of mouse D11Igp2 ( <i>LGP2</i> ) **                          | Helicase                                        | 4.9                               |
| Phospholipid scramblase 1 ( <i>PLSCR1</i> ) **                               | Phospholipid scramblase                         | 4.6*                              |
| Interferon stimulated gene 20kDa ( <i>ISG20</i> ) **                         | Immune response, proliferation                  | 4.1                               |
| 2'-5'-oligoadenylate synthetase 2 ( <i>OAS2</i> ) **                         | Immune response, nucleic acid metabolism        | 4.1*                              |
| Interferon regulatory factor 7 ( <i>IRF7</i> )                               | Transcription factor, antiviral response        | 3.8                               |
| Cytokine receptor CRL2 precursor ( <i>CLRF2</i> )                            | Interferon-class cytokine receptor              | 3.7                               |
| Interferon-induced protein with tetratricopeptide repeats 5 ( <i>IFIT5</i> ) | Immune response                                 | 3.2                               |
| Interferon induced with helicase C domain 1 ( <i>IFIH1</i> )                 | Helicase, Deoxyribonuclease                     | 3.2                               |
| KIAA1117 protein                                                             | Unknown                                         | 3.0                               |
| Metallothionein 1X ( <i>MT1X</i> )                                           | Metal ion binding                               | 2.7*                              |
| Myotubularin related protein 9 ( <i>MTMR9</i> )                              | Myotubularin-related protein                    | 2.7                               |
| Nuclear antigen Sp100 ( <i>SP100</i> )                                       | Regulation of transcription                     | 2.7*                              |
| Metallothionein 1H-like ( <i>MT1H</i> ) **                                   | Metal ion binding                               | 2.5                               |
| Promyelocytic leukemia ( <i>PML</i> )                                        | Regulation of transcription                     | 2.5                               |
| Tudor repeat associator with PCTAIRE 2 ( <i>TDRD7</i> )                      | Nucleic acid binding                            | 2.5                               |
| Metallothionein 1F ( <i>MT1F</i> )                                           | Metal ion binding                               | 2.4*                              |
| Hypothetical protein from clone 643 ( <i>TFCP2</i> )                         | Transcription factor                            | 2.4                               |
| Spermidine/spermine N1-acetyltransferase ( <i>SAT</i> )                      | Acyltransferase activity                        | 2.4                               |
| Hypothetical protein FLJ10260                                                | Unknown                                         | 2.2                               |
| Interferon induced transmembrane protein 3 ( <i>IFITM3</i> )                 | Immune response                                 | 2.2                               |
| KIAA0650 protein                                                             | ATP binding                                     | 2.2                               |
| Metallothionein 2A ( <i>MT2A</i> ) **                                        | Metal ion binding                               | 2.2                               |
| Myristoylated alanine-rich protein kinase C substrate ( <i>MARCKS</i> )      | Cell motility                                   | 2.1                               |
| Core 1 beta-3-galactosyltransferase ( <i>C1GALT</i> )                        | Galactosyltransferase                           | 2.0                               |
| T-complex-associated-testis-expressed 1-like 1 ( <i>TCTEL1</i> )             | Microtubule motor activity, cell cycle          | 2.0                               |
| Early growth response 3 ( <i>EGR3</i> )                                      | Regulation of transcription, muscle development | -2.4                              |
| Plakophilin 4 ( <i>PKP4</i> )                                                | Chromatin assembly                              | -2.8                              |

Genes had a probe set differentially expressed by more than 2-fold ( $p < 0.001$ ); decreased fold changes are indicated with a negative sign.

\*Significant gene upregulation was observed in multiple probe sets. The displayed changes in expression are the average (geometric mean).

\*\*Gene was also upregulated in normal donor PBMCs at 18 hours

# Supplemental Data Table 1D

## Gene Regulation in Monocytes from normal donors following 18hr IFN- $\alpha$ treatment *in vitro*

| Gene                                                                     | Function                                               | Fold Change Post vs Pre-treatment |
|--------------------------------------------------------------------------|--------------------------------------------------------|-----------------------------------|
| Interferon stimulated gene 20kDa ( <i>ISG20</i> ) **                     | Immune response, proliferation                         | 29.5                              |
| Ubiquitin specific protease 18 ( <i>USP18</i> ) **                       | Ubiquitin-dependent protein catabolism                 | 23.4                              |
| Phorbolin 1 ( <i>PHRBN</i> )                                             | mRNA editing                                           | 19.8                              |
| Chromosome 1 open reading frame 29 ( <i>C1orf29</i> )                    | Electron transport                                     | 16.8                              |
| CD69 antigen ( <i>CD69</i> )                                             | T-cell activation                                      | 16.0                              |
| 2'-5'-oligoadenylate synthetase-like ( <i>OASL</i> ) **                  | Immune response, nucleic acid metabolism               | 11.6*                             |
| Guanylate binding protein 1, interferon-inducible, 67kDa ( <i>GBP1</i> ) | Immune response                                        | 12.1                              |
| Interferon-induced protein 44 ( <i>IFI44</i> ) **                        | Antiviral response                                     | 12.0                              |
| Interferon induced transmembrane protein 1 (9-27) ( <i>IFITM1</i> )      | Immune response, negative regulation of proliferation  | 11.6                              |
| Myxovirus (influenza virus) resistance 1, ( <i>MX1</i> )                 | Apoptosis, immune response                             | 8.6                               |
| Apolipoprotein L, 3 ( <i>APOL3</i> )                                     | Inflammatory response, lipid binding/transport         | 6.0                               |
| Hect domain and RLD5 ( <i>HERC5</i> ) **                                 | Regulation of cyclin dependent protein kinase activity | 5.9                               |
| 2'-5'-oligoadenylate synthetase 3 ( <i>OAS3</i> )                        | Immune response, nucleic acid metabolism               | 5.4                               |
| Torsin family 1, member B (torsin B) ( <i>TOR1B</i> )                    | Protein folding                                        | 4.7                               |
| Interferon regulatory factor 1 ( <i>IRF1</i> )                           | Transcription factor, immune response                  | 4.6                               |
| Interleukin 15 receptor, alpha ( <i>IL15RA</i> )                         | Proliferation                                          | 4.5                               |
| A kinase (PRKA) anchor protein 2 ( <i>AKAP2</i> )                        | Enzyme binding                                         | 4.3                               |
| Chromosome 9 open reading frame 91 ( <i>C9orf91</i> )                    | Electron transport                                     | 3.6                               |
| Nedd4 binding protein 1 ( <i>N4BP1</i> ) **                              | Unknown                                                | 3.6                               |
| Lymphocyte cytosolic protein 2 ( <i>LCP2</i> )                           | Immune response                                        | 3.5*                              |
| Likely ortholog of rat zinc-finger antiviral protein                     | Unknown                                                | 3.4                               |
| Proteasome (prosome, macropain) subunit, beta type, 9 ( <i>PSMB9</i> )   | Immune response, peptidolysis                          | 3.4                               |
| Cullin 1 ( <i>CUL1</i> )                                                 | Apoptosis, cell cycle arrest (G1/S transition)         | 3.3                               |
| Transcription factor ets                                                 | Unknown                                                | 3.3                               |
| Myotubularin related protein 9 ( <i>MTMR9</i> )                          | Myotubularin-related protein                           | 3.2                               |
| Signal transducer and activator of transcription 1 ( <i>STAT1</i> )      | Transcription factor, JAK-STAT pathway                 | 3.0                               |
| Three prime repair exonuclease 1 ( <i>TREX1</i> ) **                     | DNA repair and replication                             | 2.6                               |
| Tumor necrosis factor receptor superfamily, member 5 ( <i>TNFRSF5</i> )  | Apoptosis, inflammatory response, B-cell proliferation | 2.5                               |
| H.sapiens gene from PAC 747L4                                            | Unknown                                                | 2.3                               |
| PHD finger protein 15 ( <i>PHF15</i> )                                   | Regulation of transcription                            | 2.3                               |
| Leukocyte immunoglobulin-like receptor 7 ( <i>LIR7</i> ) **              | Immune response                                        | 2.2                               |
| Metallothionein 1F ( <i>MT1F</i> )                                       | Metal ion binding                                      | 2.2                               |
| RAB9A, member RAS oncogene family ( <i>RAB9A</i> )                       | Protein transport, GTPase mediated signal transduction | 2.2                               |
| RNA binding motif protein 8A ( <i>RBM8A</i> )                            | mRNA splicing                                          | -2.0                              |
| KIAA0232                                                                 | Unknown                                                | -2.1                              |
| Rho GDP dissociation inhibitor beta ( <i>ARHGDI2</i> )                   | Immune response, negative regulation of cell adhesion  | -2.1                              |
| Ornithine aminotransferase ( <i>OAT</i> )                                | Amino acid metabolism, visual perception               | -2.1                              |
| Chromosome 12 open reading frame 24 ( <i>C12orf24</i> )                  | Unknown                                                | -2.1                              |
| FLJ35653                                                                 | Unknown                                                | -2.2                              |
| EST sequence                                                             | Unknown                                                | -2.2                              |
| PHD finger protein 20 ( <i>PHF20</i> )                                   | Regulation of transcription                            | -2.3                              |
| Furry homolog ( <i>FRY</i> )                                             | Unknown                                                | -2.3                              |
| Family with sequence similarity 13, member A1 ( <i>FAM13A1</i> )         | Unknown                                                | -2.3*                             |
| Heterogeneous nuclear ribonucleoprotein A1 ( <i>HNRPA1</i> )             | mRNA processing                                        | -2.3                              |
| Ribosomal protein L22 ( <i>RPL22</i> )                                   | Structural constituent of ribosome                     | -2.4*                             |
| Dihydropyrimidine dehydrogenase ( <i>DPYD</i> )                          | Electron transport                                     | -2.5                              |
| F-box and WD repeat domain containing 2 ( <i>FBXW2</i> )                 | Ubiquitin-mediated protein degradation                 | -2.5                              |
| Eukaryotic translation elongation factor 1 gamma ( <i>EEF1G</i> )        | Protein biosynthesis, translation elongation factor    | -2.6                              |
| Ribosomal protein L3 ( <i>RPL3</i> )                                     | Structural constituent of ribosome                     | -2.6*                             |
| Translocase of outer mitochondrial membrane 20 homolog ( <i>TOMM20</i> ) | Protein-mitochondrial targeting                        | -2.8                              |
| dUTP pyrophosphatase ( <i>DUT</i> )                                      | DNA replication                                        | -3.1                              |

Genes had a probe set differentially expressed by more than 2-fold ( $p < 0.001$ ) ; decreased fold changes are indicated with a negative sign.

\*Significant gene upregulation was observed in multiple probe sets. The displayed changes in expression are the average (geometric mean).

\*\*Gene was also upregulated in normal donor PBMCs at 18 hours
