# Supplementary material
Source: PubMed Central journal article supplement (PMC2762274)

**Figure 1**

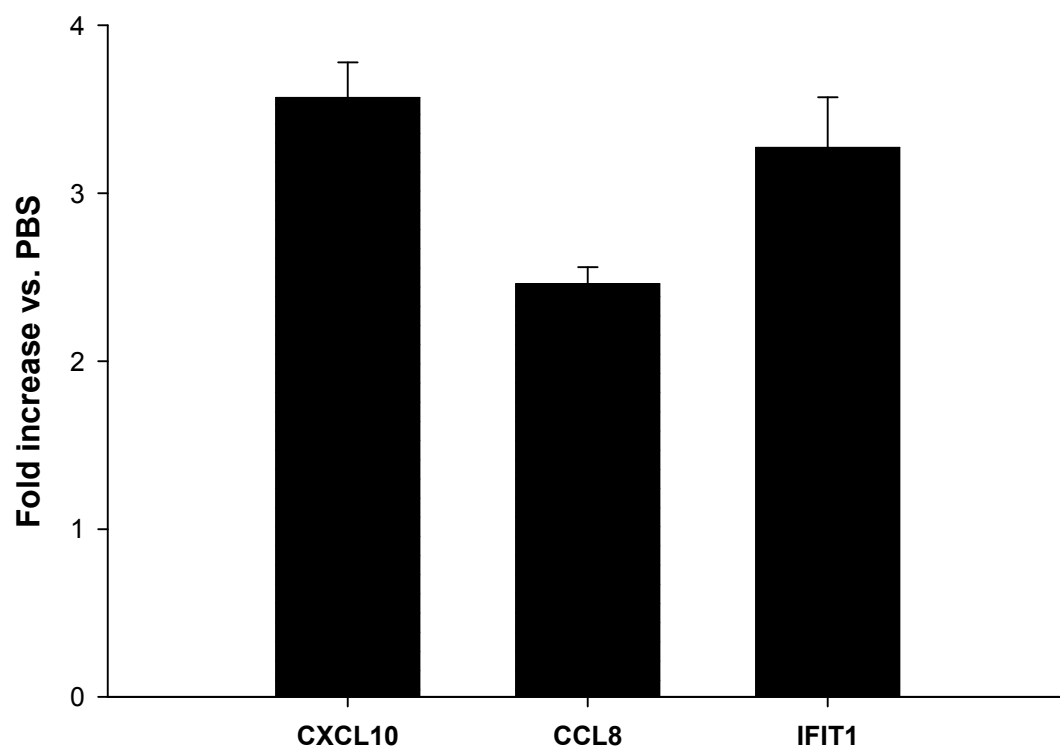

**Figure 2**

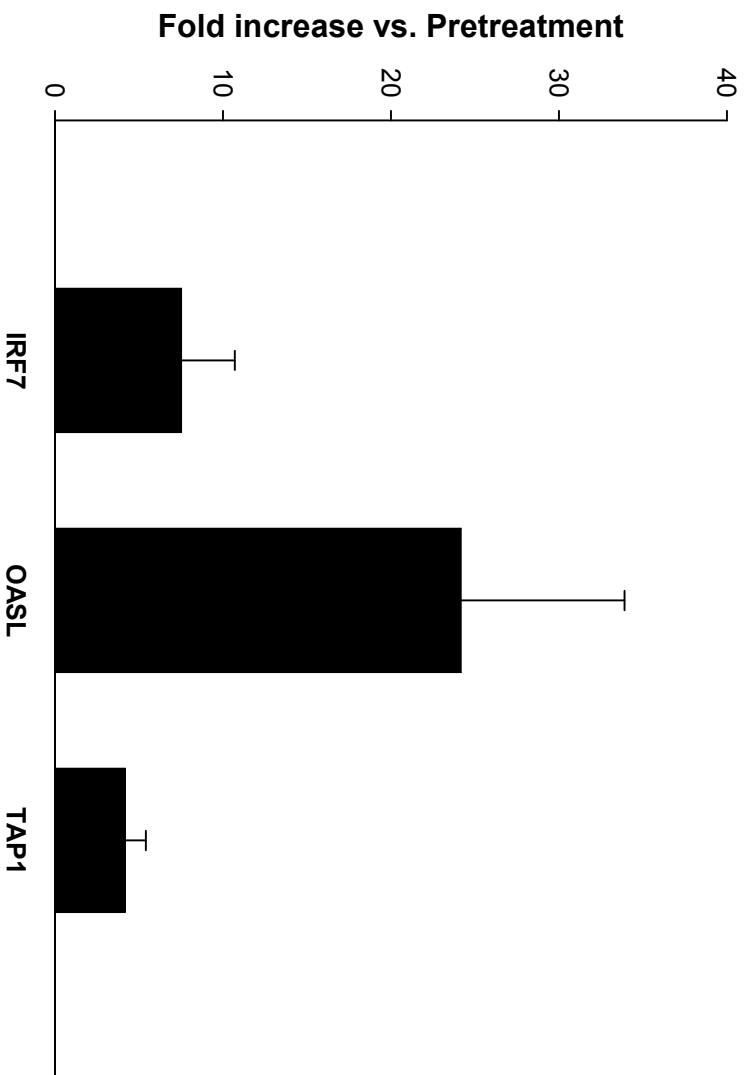

# Supplemental Data Figure 1

A

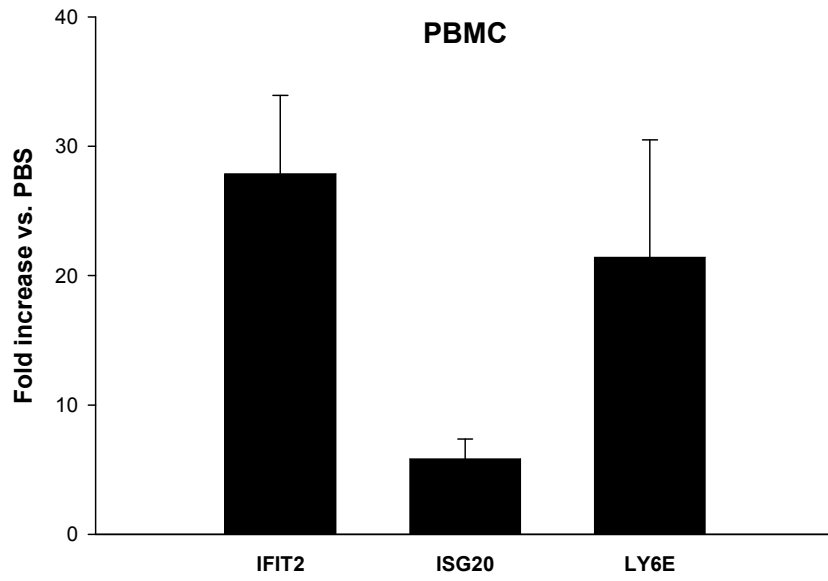

B

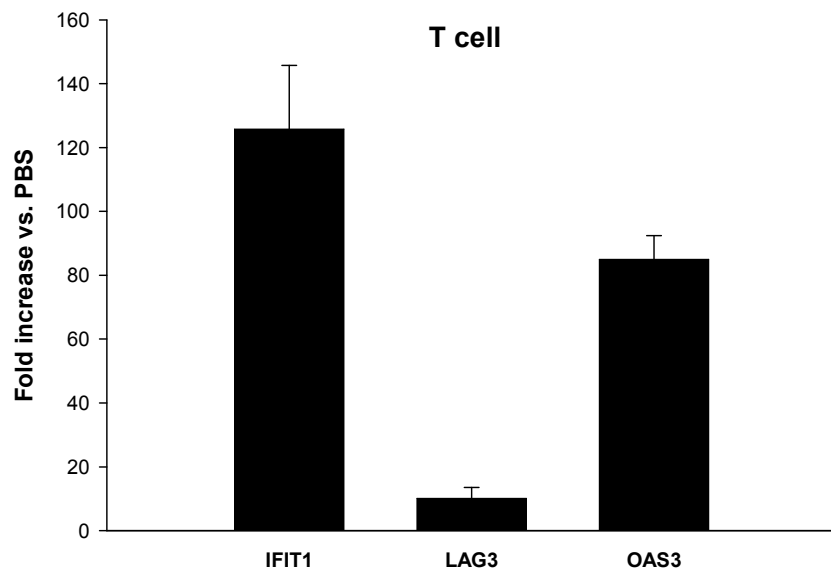

# Supplemental Data Figure 1

C

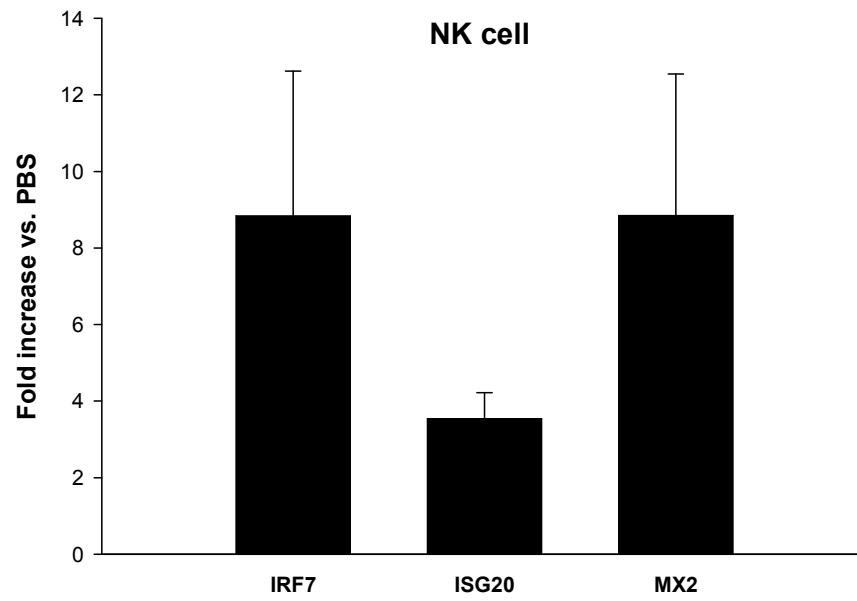

D

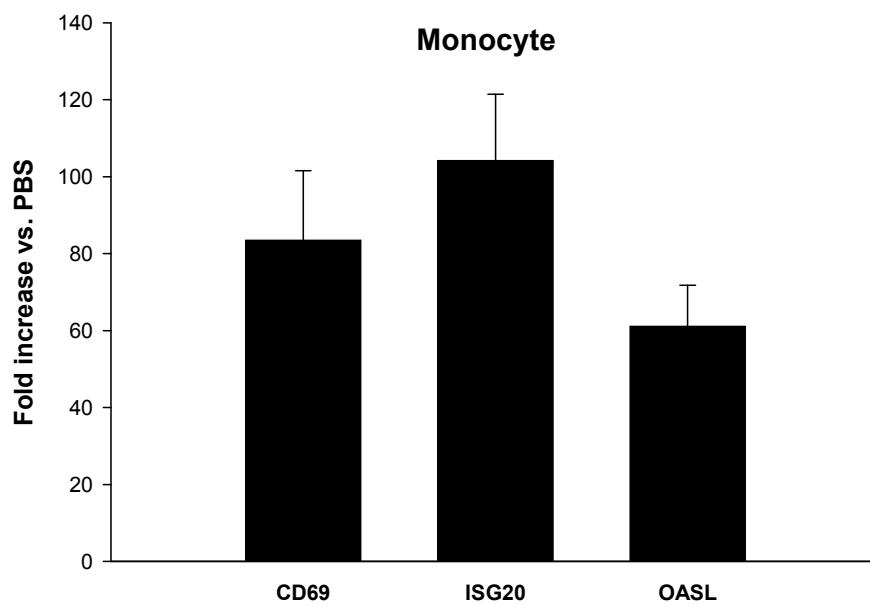

Supplement: NIHMS132075-supplement-supp_figs.pdf [file NIHMS132075-supplement-supp_figs.pdf]
